# Supplementary material for: Two-dimensional PdSn meso–macroporous nanosieves for robust methanol electrooxidation
Source: Royal Society of Chemistry journal article supplement (doi:10.1039/d5cc05820a), 2026-01-01
Supplement: d5cc05820a1.pdf [file d5cc05820a1.pdf]

**Supporting Information for**  
**Two-Dimensional PdSn Meso-Macroporous Nanosieves for Robust**  
**Methanol Electrooxidation**

*Xiyue Zhang,<sup>a</sup> Wen Zhang,<sup>a</sup> Fei Gao,<sup>a\*</sup> Chang Zhou,<sup>a</sup> Tienan Zhang,<sup>a</sup> Yunchong Cao,<sup>a</sup> Shanshan Zhang,<sup>a</sup> Tingjie Mao,<sup>b</sup> Juan Wang,<sup>b\*</sup> and Yangping Zhang,<sup>a\*</sup>*

<sup>a</sup> *School of Environmental and Chemical Engineering, Jiangsu University of Science and Technology, Zhenjiang, 212003, China*

<sup>b</sup> *College of Chemistry and Materials Engineering, Wenzhou University, Wenzhou, 325035, China*

*\*Corresponding author: E-mail: gaofei006@just.edu.cn (F. Gao),  
juanwang@wzu.edu.cn (J. Wang), ypzhang@just.edu.cn (Y. Zhang).*

## **Experimental Section**

### **1. Reagents and chemicals**

Sodium tetrachloropalladate ( $\text{NaPdCl}_4$ ,  $\geq 98\%$ ), Tin(II) oxalate ( $\text{C}_2\text{O}_4\text{Sn}$ ,  $\geq 99.7\%$ ), hexacarbonyl tungsten ( $\text{W}(\text{CO})_6$ ,  $\geq 97\%$ ) was purchased from Energy Chemical Co., Ltd. (Shanghai, China). N, N-Dimethylformamide (DMF,  $\geq 99.5\%$ ), methanol ( $\text{CH}_4\text{O}$ ,  $\geq 99.5\%$ ), acetic acid ( $\text{C}_2\text{H}_4\text{O}_2$ ,  $\geq 99\%$ ) were purchased from Sinopharm Chemical Reagent Co. Ltd. (Shanghai, China). All chemicals were used without any purifications. The water ( $18\text{ M}\Omega\text{ cm}^{-1}$ ) used in all experiments was obtained by passing through an ultrapure purification system.

### **2. Synthesis of sub-two nanometer Pd<sub>4</sub>Sn Meso-Macroporous Nanosieves (MNSs), Pd<sub>2</sub>Sn MNSs and Pd<sub>8</sub>Sn MNSs.**

For the synthesis of Pd<sub>4</sub>Sn MNSs, typically,  $\text{NaPdCl}_4$  (10 mg),  $\text{C}_2\text{O}_4\text{Sn}$  (1.5 mg),  $\text{W}(\text{CO})_6$  (30mg) was dispersed in 2 mL acetic acid and 8 mL DMF with ultrasonication. Then, the mixture was heated in an oil bath at 140 °C for 3h. The products were collected by centrifugation and washed with ethanol for 3 times, then disperse in ethanol for further use. The synthesis of Pd<sub>2</sub>Sn MNSs and Pd<sub>8</sub>Sn MNSs was similar to

that of Pd<sub>4</sub>Sn MNSs by simply alter the content of C<sub>2</sub>O<sub>4</sub>Sn.

### **3. Characterizations**

The morphologies, sizes, and structures of the catalysts were observed using transmission electron microscopy (TEM, acceleration voltage: 120 kV, HT-7700), and high-resolution transmission electron microscopy (HRTEM, working voltage: 200 kV, F20). X-ray diffraction (XRD) spectra were collected by the X'Pert-Pro MPD diffractometer (Netherlands PANalytical) with a 40 kV Cu K $\alpha$  radiation. The contents of Pd and Sn were determined by scanning electron microscopy-energy dispersive X-ray spectroscopy (SEM-EDS) with a working voltage of 15 kV. X-ray photoelectron spectroscopy (XPS) was performed on a VG Scientific ESCALab 220 XL spectrometer using 300 W Al K $\alpha$  radiation to identify the valence states and chemical bonds of various elements in the samples.

### **4. Electrochemical measurements**

The tests were carried out on a CHI660E electrochemical workstation manufactured by Shanghai Chenhua Instrument Co., Ltd., China. A three-electrode system was employed (counter electrode: a platinum wire; reference electrode: a saturated calomel electrode (SCE); working electrode: a glassy-carbon electrode (GCE) with a diameter of 5 mm). Before tests, GCE was polished with aluminum oxide (Al<sub>2</sub>O<sub>3</sub>) until its surface became shiny. As for the working electrode preparation, 2 mg of different catalysts were ultrasonically dispersed in a mixture containing 496  $\mu$ L of isopropanol and 4  $\mu$ L of Nafion (5%) for 30 minutes to form a homogeneous catalyst ink. Initially, 5  $\mu$ L of the catalyst ink was dropped onto the surface of the polished GCE and allowed to dry. Subsequently, another 3  $\mu$ L of the ink was dropped to ensure the catalyst completely covered the working electrode, and then it was dried again. The cyclic voltammetry (CV) curves in 0.5 M KOH at a scan rate of 50 mV s<sup>-1</sup> were recorded to measure the electrochemical active surface area (ECSA) value. The MOR tests were operated in 0.5 M KOH and 1 M methanol. The catalytic stability was evaluated by chronoamperometry (i-t) tests and successive CV tests. For comparison, commercial Pd/C (JM, 20 wt% Pd) was used as the control catalyst.

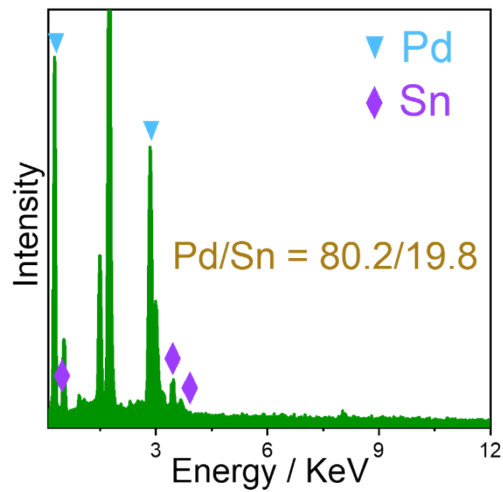

**Fig. S1** EDS pattern of Pd<sub>4</sub>Sn MNSs.

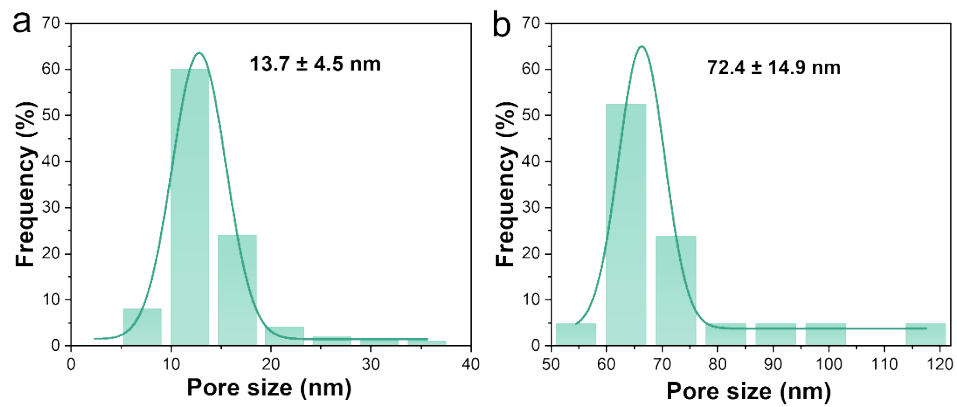

**Fig. S2** Pore size distribution histograms of Pd<sub>4</sub>Sn MNSs for (a) mesopores and (b) macropores.

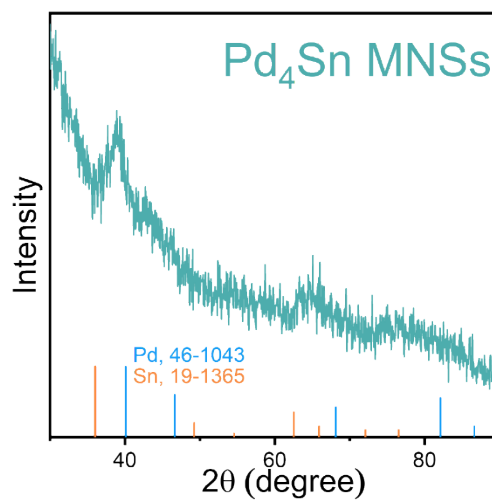

**Fig. S3** XRD pattern of Pd<sub>4</sub>Sn MNSs.

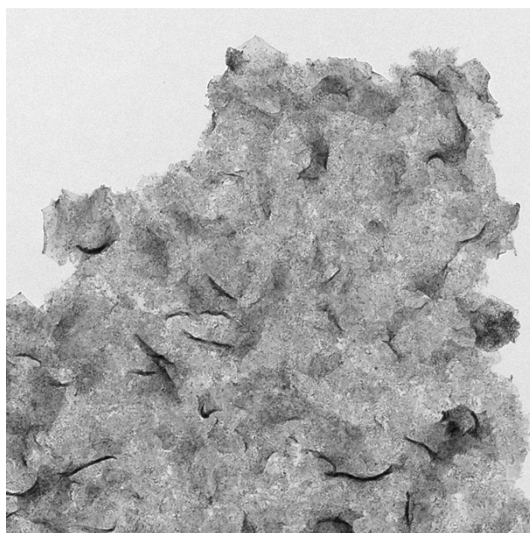

**Fig. S4** Additional TEM images of  $\text{Pd}_2\text{Sn}$  MNSs.

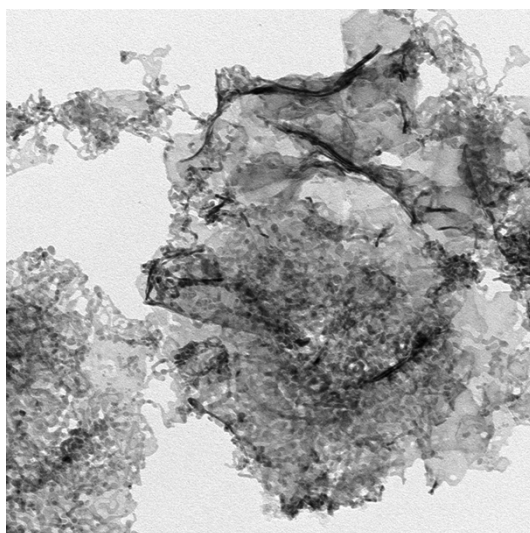

**Fig. S5** Additional TEM images of  $\text{Pd}_8\text{Sn}$  MNSs.

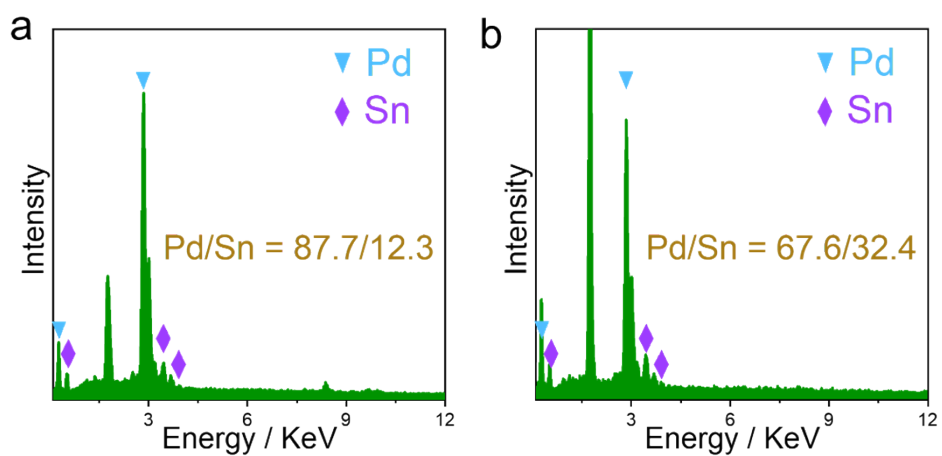

**Fig. S6** EDS pattern of (a) Pd<sub>8</sub>Sn MNs and (b) Pd<sub>2</sub>Sn MNs.

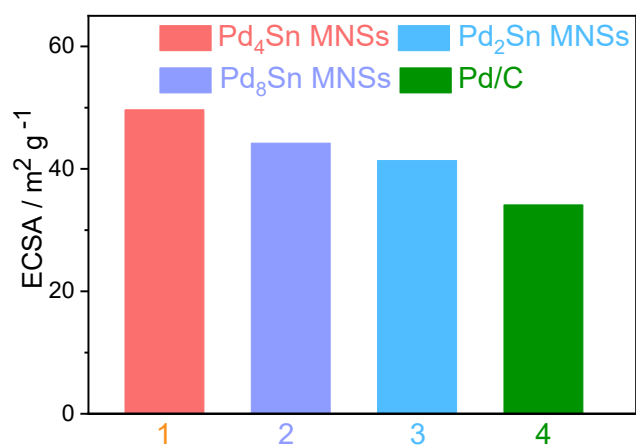

**Fig. S7** Calculated ECSA values of Pd<sub>4</sub>Sn MNs, Pd<sub>8</sub>Sn MNs, Pd<sub>2</sub>Sn MNs and Pd/C catalysts, respectively.

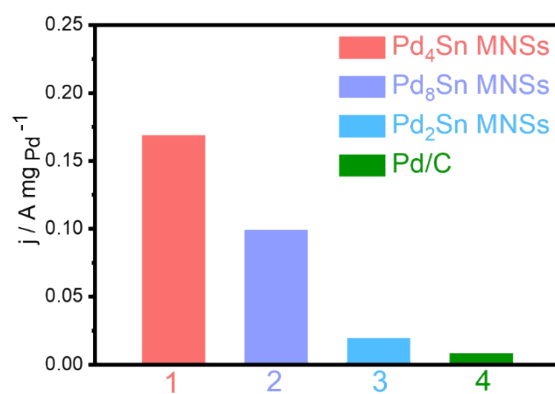

**Fig. S8** Calculated remaining activity of Pd<sub>4</sub>Sn MNSs, Pd<sub>8</sub>Sn MNSs, Pd<sub>2</sub>Sn MNSs and Pd/C catalysts after i-t tests.

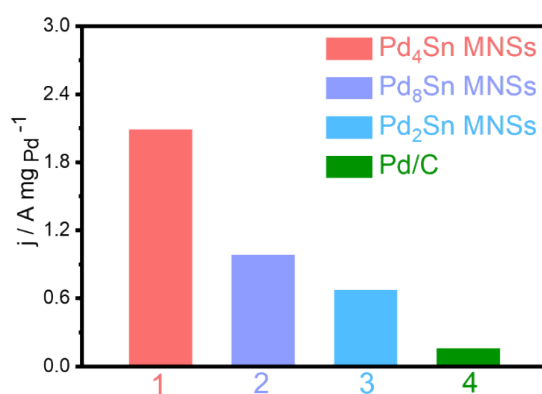

**Fig. S9** Calculated remaining activity of Pd<sub>4</sub>Sn MNSs, Pd<sub>8</sub>Sn MNSs, Pd<sub>2</sub>Sn MNSs and Pd/C catalysts after 500 successive cycles.

The reaction evolution processes of MOR<sup>1, 2</sup>.

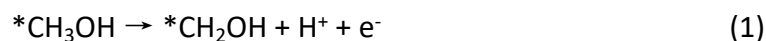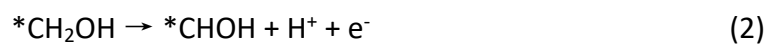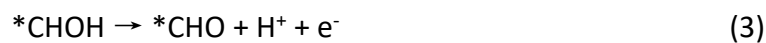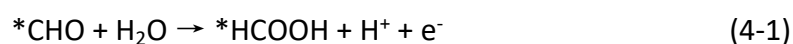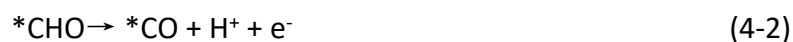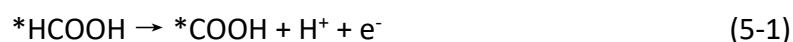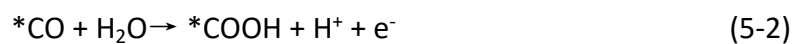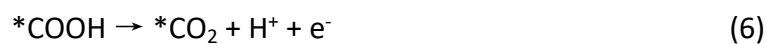

The symbol \* represents the catalyst. Among them, equations (4-1) and (5-1) represent the non-CO pathway of the MOR, while equations (4-2) and (5-2) correspond to the CO pathway. The other reaction steps are identical in both the CO and non-CO pathways.

1. Y. Qin, K. Yu, G. Wang, Z. Zhuang, Y. Dou, D. Wang and Z. Chen, *Angew. Chem. Int. Ed.*, 2025, **64**, e202420817.

2. Y. Lv, P. Liu, R. Xue, Q. Guo, J. Ye, D. Gao, G. Jiang, S. Zhao, L. Xie, Y. Ren, P. Zhang, Y. Wang and Y. Qin, *Adv. Sci.*, 2024, **11**, e2309813.

**Table. S1** MOR performances of Pd<sub>4</sub>Sn MNSs and various electrocatalysts from published works.

| Catalysts                                          | Peak currents from CV curves         |                                       | Electrolyte                          | Reference                                                  |
|----------------------------------------------------|--------------------------------------|---------------------------------------|--------------------------------------|------------------------------------------------------------|
|                                                    | J <sub>m</sub> (A mg <sup>-1</sup> ) | J <sub>s</sub> (mA cm <sup>-2</sup> ) |                                      |                                                            |
| Pd <sub>4</sub> Sn MNSs                            | 2.321                                | 4.67                                  | 0.5 M KOH + 1 M CH <sub>3</sub> OH   | This work                                                  |
| Pd <sub>4</sub> Sn WNWs                            | 1.04                                 | 0.12                                  | 0.1 M KOH + 0.5 M CH <sub>3</sub> OH | <i>Nano Lett.</i> , <b>2019</b> , 19, 6894-6903            |
| CrO <sub>x</sub> -Pd                               | 2.05                                 | 5.30                                  | 1 M KOH + 1 M CH <sub>3</sub> OH     | <i>Nano Lett.</i> , <b>2023</b> , 23, 9555-9562            |
| Pd-PdO PNTs                                        | 1.111                                | 4.69                                  | 0.1 M KOH + 0.3 M CH <sub>3</sub> OH | <i>Adv. Funct. Mater.</i> , <b>2020</b> , 30, 2000534.     |
| Pd <sub>72</sub> Cu <sub>14</sub> Co <sub>14</sub> | 1.062                                |                                       | 1 M KOH + 1 M CH <sub>3</sub> OH     | <i>J. Energy Chem.</i> , <b>2019</b> , 29, 72.             |
| Pd-Co J-NWs                                        | 1.205                                | 3.584                                 | 1 M KOH + 1 M CH <sub>3</sub> OH     | <i>ACS Appl. Mater. Inter.</i> , <b>2018</b> , 10, 29965   |
| PdAg@Pd                                            | 1.38                                 | 1.50                                  | 0.5 M NaOH + 1 M CH <sub>3</sub> OH  | <i>J. Power Sources</i> , <b>2018</b> , 398, 201.          |
| PdFe NCs                                           | 1.07                                 | 3.4                                   | 1 M KOH + 1 M CH <sub>3</sub> OH     | <i>Nanoscale</i> , <b>2020</b> , 12, 2126–2132.            |
| Pd <sub>2</sub> Cu <sub>2</sub> /rGO               | 0.916                                |                                       | 1 M KOH + 1 M CH <sub>3</sub> OH     | <i>J. Mater. Sci.</i> , <b>2018</b> , 53, 15871.           |
| Pd <sub>0.52</sub> Ag                              | 1.38                                 |                                       | 0.5 M NaOH + 1 M CH <sub>3</sub> OH  | <i>Angew. Chem. Int. Ed.</i> , <b>2019</b> , 58, 8794-8798 |
